# Supplementary material for: A terrestrial record of atmospheric CO2 across the Middle Eocene Climatic Optimum
Source: Research Square preprint supplement (doi:10.21203/rs.3.rs-8583111/v1), 2026-01-29
Supplement: Supplementary file 1 [file 0544a7f29468582dd970d2dc.pdf]

Supplementary material to

## A terrestrial record of atmospheric CO<sub>2</sub> across the Middle Eocene Climatic Optimum

Nikhil Sharma<sup>1\*</sup>, László Kocsis<sup>2</sup>

<sup>1</sup>Department of Geosciences, Swedish Museum of Natural History, Box 50007, SE-104 05 Stockholm, Sweden

<sup>2</sup>Institute of Earth Surface Dynamics (IDYST), University of Lausanne, Building Géopolis, UNIL – Mouline, CH-1015 Lausanne, Switzerland

Corresponding author: [Nikhil.Sharma@nrm.se](mailto:Nikhil.Sharma@nrm.se)

### SUPPLEMENTARY TEXT & FIGURES

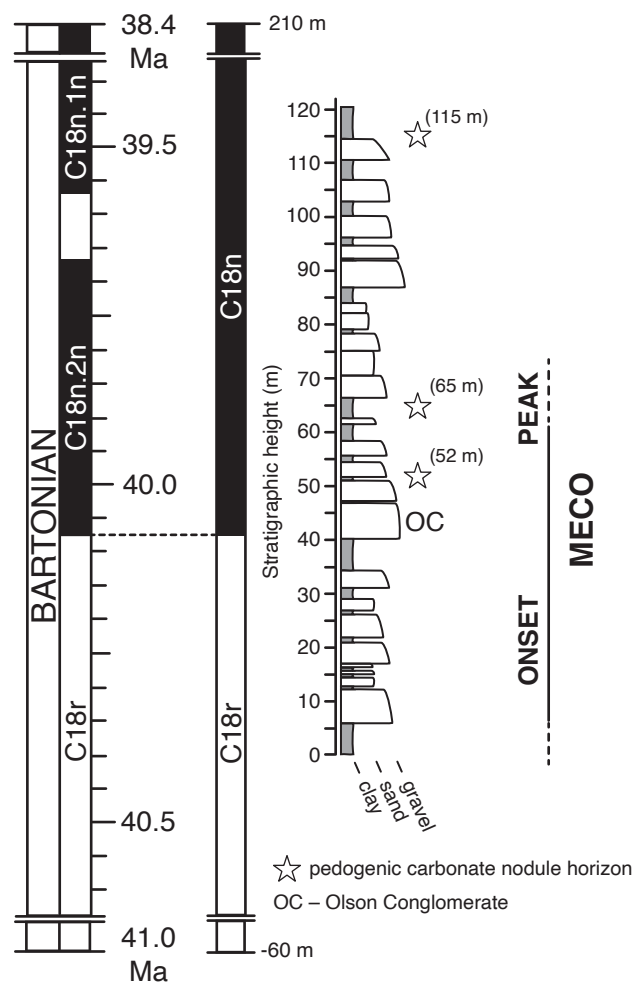

**Fig. S1 Stratigraphy of the Olson section.** Stratigraphic log showing lithology, magnetostratigraphic framework, age model, and stratigraphic positions of analyzed pedogenic carbonate nodule horizons. The onset and peak of the Middle Eocene Climatic Optimum (MECO) are indicated based on organic carbon isotope data from [Sharma et al. \(2024\)](#).

### Monte Carlo CO<sub>2</sub> distributions by stratigraphic height

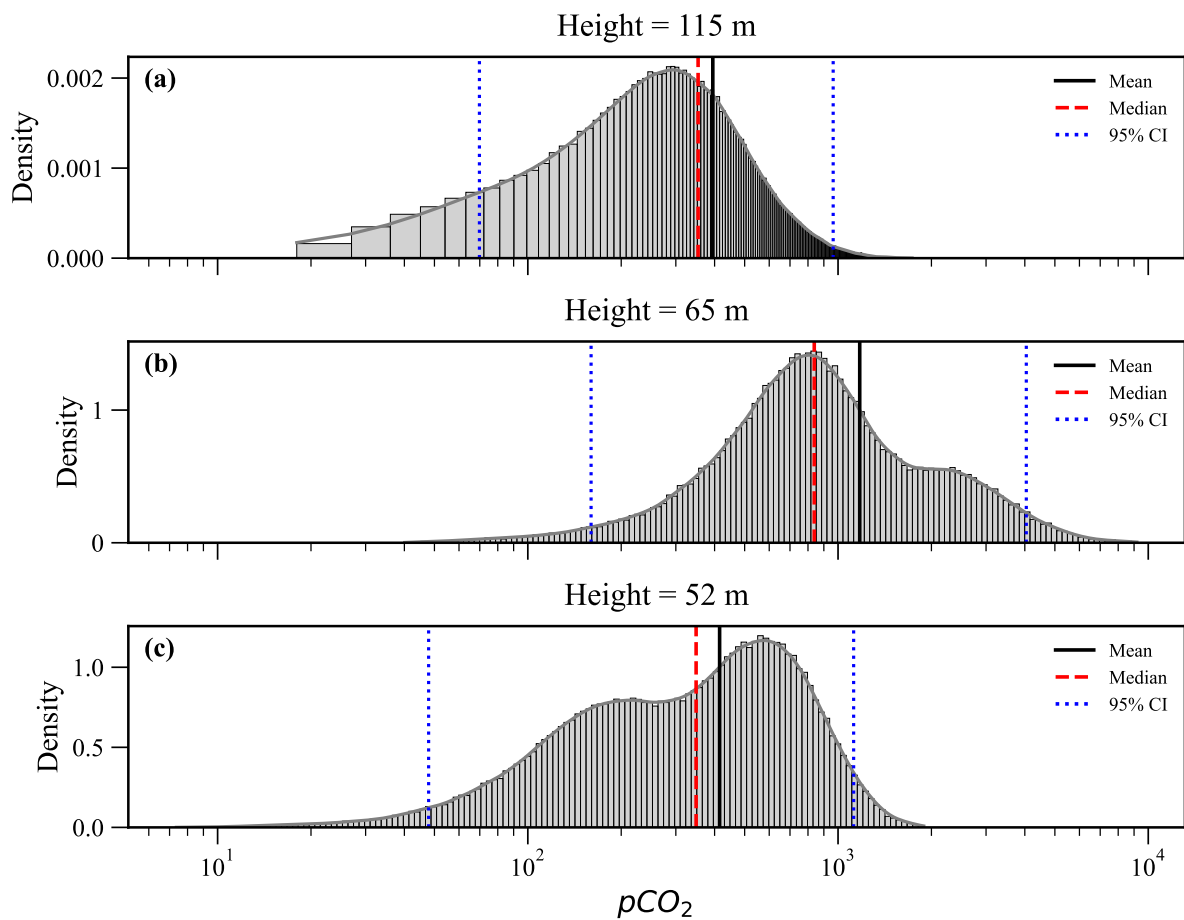

**Fig. S2 Monte Carlo distributions of reconstructed atmospheric CO<sub>2</sub> by stratigraphic height in the Olson section.** Probability density functions derived from Monte Carlo CO<sub>2</sub> simulations are shown for paleosol carbonate horizons at (a) 115 m, (b) 65 m, and (c) 52 m stratigraphic height. Histograms represent the full ensemble of simulated CO<sub>2</sub> values for each horizon, displayed on a logarithmic CO<sub>2</sub> axis. Vertical black solid lines indicate the mean CO<sub>2</sub> estimate, red dashed lines indicate the median, and blue dotted lines denote the 95% confidence interval of the simulated distributions.

Together, these distributions illustrate both the central tendency and uncertainty structure of CO<sub>2</sub> reconstructions at each stratigraphic level.

For comparison, atmospheric CO<sub>2</sub> was also reconstructed using the formulation of [Cotton and Sheldon \(2012\)](#), which estimates soil-respired CO<sub>2</sub> concentrations (S(z)) from mean annual precipitation (MAP) through an empirical relationship. Application of this approach to the Olson section results in CO<sub>2</sub> estimates that are markedly higher than those derived from the paleosol carbonate CO<sub>2</sub> paleobarometer and exceed reasonable bounds imposed by independent middle Eocene CO<sub>2</sub> records. The obtained values are therefore considered inconsistent with the present study. Moreover, this approach does not perform reliably for weakly developed soils such as Entisols. For paleosol-based CO<sub>2</sub> reconstructions, accurate identification and characterization of soil type are therefore critical.

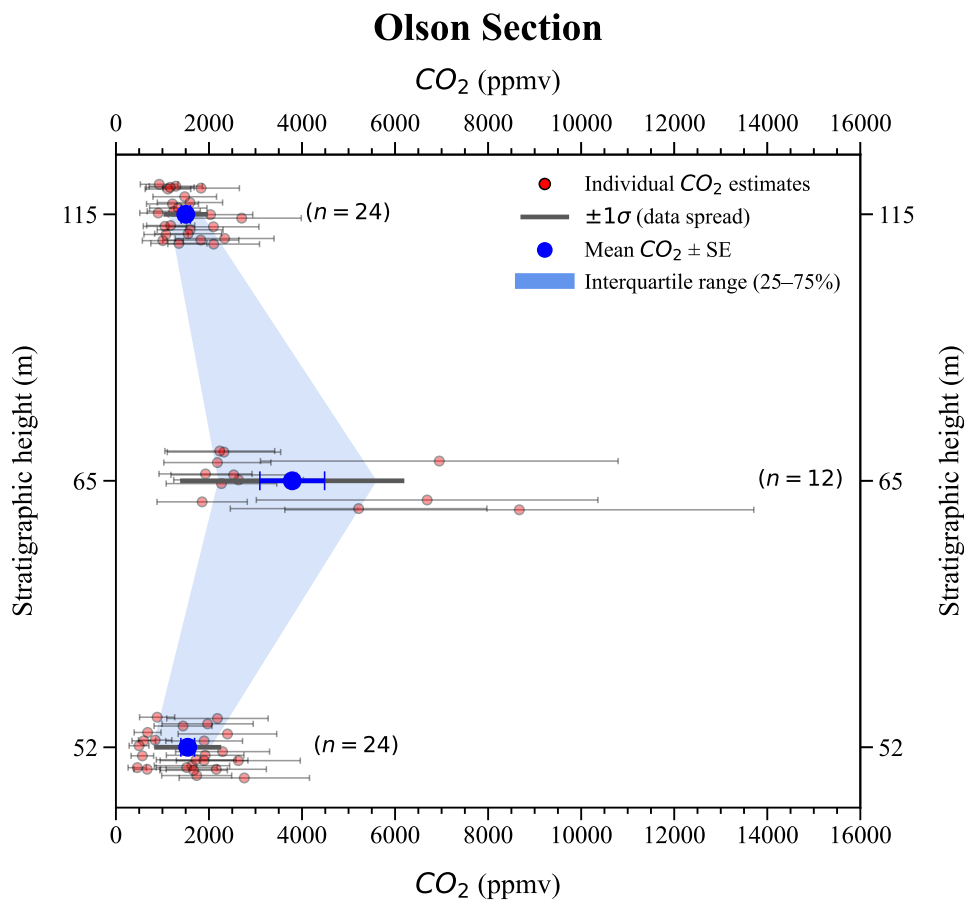

**Fig. S3 Atmospheric CO<sub>2</sub> estimates from the Olson section calculated using the Cotton and Sheldon (2012) approach.** Atmospheric CO<sub>2</sub> reconstructions derived

using the pedogenic carbonate paleobarometer in which soil-respired CO<sub>2</sub> concentrations (S(z)) are estimated from mean annual precipitation (MAP) following the empirical calibration of [Cotton and Sheldon \(2012\)](#). Individual red circles represent CO<sub>2</sub> estimates for each paleosol carbonate sample, with horizontal error bars indicating propagated 1 $\sigma$  uncertainties. Dark horizontal bars denote  $\pm 1\sigma$  variability (data spread) at each stratigraphic horizon, while blue circles show mean CO<sub>2</sub> values with horizontal bars indicating the standard error of the mean (SE). The shaded blue envelope represents the interquartile range (25–75%) of CO<sub>2</sub> estimates at each stratigraphic level. Numbers in parentheses indicate the number of individual estimates ( $n$ ) per horizon. This approach yields substantially elevated CO<sub>2</sub> values, particularly at the 65 m horizon, and is interpreted to be inconsistent with the weakly developed paleosols examined here.

## REFERENCES

1. Sharma, N. et al. Middle Eocene Climatic Optimum (MECO) and its imprint in the continental Escanilla Formation, Spain. *Clim. Past* 20, 935–949 (2024).
2. Cotton, J. M. & Sheldon, N. D. New constraints on using paleosols to reconstruct atmospheric pCO<sub>2</sub>. *GSA Bull.* 124, 1411–1423 (2012).
