# Supplementary material for: A terrestrial record of atmospheric CO2 across the Middle Eocene Climatic Optimum
Source: Research Square preprint supplement (doi:10.21203/rs.3.rs-8583111/v1), 2026-01-29
Supplement: Supplementary file 1 [file 066763f527594794156d0233.xlsx]

## Sheet: Sheet1
Sample	Replicate	Height_m	Ef	Ef_err	d13C_s	d13C_s_err	d13C_r	d13C_r_err	d13C_a	d13C_a_err	pCO2	pCO2_err
NN1	NN1.1	52	8.12453	0.421576	-11.9927	0.413283	-24.33	0.2	-5.14545	0.181818	469.938	241.979
NN1	NN1.1	52	8.12453	0.421576	-11.9927	0.413283	-25.39	0.2	-6.10909	0.181818	619.289	319.502
NN1	NN1.1	52	8.12453	0.421576	-11.9927	0.413283	-20.41	0.2	-1.58182	0.181818	157.803	82.6164
NN1	NN1.2	52	8.16292	0.419144	-12.0345	0.410866	-24.33	0.2	-5.14545	0.181818	464.653	239.18
NN1	NN1.2	52	8.16292	0.419144	-12.0345	0.410866	-25.39	0.2	-6.10909	0.181818	612.089	315.649
NN1	NN1.2	52	8.16292	0.419144	-12.0345	0.410866	-20.41	0.2	-1.58182	0.181818	155.569	81.4577
NN1	NN1.3	52	8.51362	0.397421	-12.3614	0.389321	-24.33	0.2	-5.14545	0.181818	425.478	218.447
NN1	NN1.3	52	8.51362	0.397421	-12.3614	0.389321	-25.39	0.2	-6.10909	0.181818	559.167	287.37
NN1	NN1.3	52	8.51362	0.397421	-12.3614	0.389321	-20.41	0.2	-1.58182	0.181818	138.72	72.6997
NN1	NN1.4	52	7.01002	0.496017	-11.178	0.487159	-24.33	0.2	-5.14545	0.181818	587.424	305.921
NN1	NN1.4	52	7.01002	0.496017	-11.178	0.487159	-25.39	0.2	-6.10909	0.181818	783.115	410.095
NN1	NN1.4	52	7.01002	0.496017	-11.178	0.487159	-20.41	0.2	-1.58182	0.181818	205.16	107.781
NN1	NN1.5	52	8.91489	0.373821	-13.0521	0.365817	-24.33	0.2	-5.14545	0.181818	353.374	181.019
NN1	NN1.5	52	8.91489	0.373821	-13.0521	0.365817	-25.39	0.2	-6.10909	0.181818	463.757	237.49
NN1	NN1.5	52	8.91489	0.373821	-13.0521	0.365817	-20.41	0.2	-1.58182	0.181818	106.283	56.2161
NN1	NN1.6	52	8.70721	0.385854	-12.8536	0.377736	-24.33	0.2	-5.14545	0.181818	372.769	191.161
NN1	NN1.6	52	8.70721	0.385854	-12.8536	0.377736	-25.39	0.2	-6.10909	0.181818	489.171	250.863
NN1	NN1.6	52	8.70721	0.385854	-12.8536	0.377736	-20.41	0.2	-1.58182	0.181818	115.196	60.7978
NN1	NN1.7	52	7.16447	0.485322	-11.3392	0.476509	-24.33	0.2	-5.14545	0.181818	561.725	291.936
NN1	NN1.7	52	7.16447	0.485322	-11.3392	0.476509	-25.39	0.2	-6.10909	0.181818	746.65	389.863
NN1	NN1.7	52	7.16447	0.485322	-11.3392	0.476509	-20.41	0.2	-1.58182	0.181818	195.162	102.507
NN1	NN1.8	52	8.33105	0.408612	-12.5056	0.400291	-24.33	0.2	-5.14545	0.181818	409.31	210.388
NN1	NN1.8	52	8.33105	0.408612	-12.5056	0.400291	-25.39	0.2	-6.10909	0.181818	537.55	276.51
NN1	NN1.8	52	8.33105	0.408612	-12.5056	0.400291	-20.41	0.2	-1.58182	0.181818	131.61	69.2887
NN2	NN2.1	65	6.99667	0.496946	-8.09116	0.489601	-21.63	0.2	-2.69091	0.181818	683.97	357.839
NN2	NN2.1	65	6.99667	0.496946	-8.09116	0.489601	-21.52	0.2	-2.59091	0.181818	663.499	346.922
NN2	NN2.1	65	6.99667	0.496946	-8.09116	0.489601	-24.84	0.2	-5.60909	0.181818	2007.7	1124.94
NN2	NN2.2	65	7.09263	0.490283	-8.17146	0.482954	-21.63	0.2	-2.69091	0.181818	668.086	348.998
NN2	NN2.2	65	7.09263	0.490283	-8.17146	0.482954	-21.52	0.2	-2.59091	0.181818	648.196	338.422
NN2	NN2.2	65	7.09263	0.490283	-8.17146	0.482954	-24.84	0.2	-5.60909	0.181818	1932.25	1074.71
NN2	NN2.3	65	6.5935	0.525346	-7.66663	0.517999	-21.63	0.2	-2.69091	0.181818	776.453	409.514
NN2	NN2.3	65	6.5935	0.525346	-7.66663	0.517999	-21.52	0.2	-2.59091	0.181818	752.449	396.495
NN2	NN2.3	65	6.5935	0.525346	-7.66663	0.517999	-24.84	0.2	-5.60909	0.181818	2504.48	1473.29
NN2	NN2.4	65	7.67966	0.45047	-8.74306	0.44324	-21.63	0.2	-2.69091	0.181818	567.211	293.886
NN2	NN2.4	65	7.67966	0.45047	-8.74306	0.44324	-21.52	0.2	-2.59091	0.181818	550.808	285.308
NN2	NN2.4	65	7.67966	0.45047	-8.74306	0.44324	-24.84	0.2	-5.60909	0.181818	1506.87	808.198
NN3	NN3.1	115	7.78984	0.4432	-12.0427	0.434592	-25	0.2	-5.75455	0.181818	551.349	284.859
NN3	NN3.1	115	7.78984	0.4432	-12.0427	0.434592	-24.3	0.2	-5.11818	0.181818	460.065	237.465
NN3	NN3.1	115	7.78984	0.4432	-12.0427	0.434592	-23.7	0.2	-4.57273	0.181818	394.201	203.464
NN3	NN3.2	115	6.84661	0.507442	-11.1381	0.498477	-25	0.2	-5.75455	0.181818	711.2	372.229
NN3	NN3.2	115	6.84661	0.507442	-11.1381	0.498477	-24.3	0.2	-5.11818	0.181818	589.302	307.409
NN3	NN3.2	115	6.84661	0.507442	-11.1381	0.498477	-23.7	0.2	-4.57273	0.181818	503.626	262.303
NN3	NN3.3	115	7.25767	0.478919	-12.0333	0.469852	-25	0.2	-5.75455	0.181818	552.769	286.882
NN3	NN3.3	115	7.25767	0.478919	-12.0333	0.469852	-24.3	0.2	-5.11818	0.181818	461.231	239.106
NN3	NN3.3	115	7.25767	0.478919	-12.0333	0.469852	-23.7	0.2	-4.57273	0.181818	395.199	204.865
NN3	NN3.4	115	9.83865	0.326102	-14.0651	0.318537	-25	0.2	-5.75455	0.181818	319.826	163.129
NN3	NN3.4	115	9.83865	0.326102	-14.0651	0.318537	-24.3	0.2	-5.11818	0.181818	265.645	135.684
NN3	NN3.4	115	9.83865	0.326102	-14.0651	0.318537	-23.7	0.2	-4.57273	0.181818	224.986	115.142
NN3	NN3.5	115	9.75474	0.329981	-13.9836	0.322376	-25	0.2	-5.75455	0.181818	326.959	166.809
NN3	NN3.5	115	9.75474	0.329981	-13.9836	0.322376	-24.3	0.2	-5.11818	0.181818	271.767	138.836
NN3	NN3.5	115	9.75474	0.329981	-13.9836	0.322376	-23.7	0.2	-4.57273	0.181818	230.401	117.925
NN3	NN3.6	115	8.65105	0.389176	-13.3358	0.380822	-25	0.2	-5.75455	0.181818	389.07	199.53
NN3	NN3.6	115	8.65105	0.389176	-13.3358	0.380822	-24.3	0.2	-5.11818	0.181818	324.718	166.662
NN3	NN3.6	115	8.65105	0.389176	-13.3358	0.380822	-23.7	0.2	-4.57273	0.181818	276.999	142.373
NN3	NN3.7	115	9.32451	0.351383	-13.7017	0.343509	-25	0.2	-5.75455	0.181818	352.742	180.266
NN3	NN3.7	115	9.32451	0.351383	-13.7017	0.343509	-24.3	0.2	-5.11818	0.181818	293.827	150.324
NN3	NN3.7	115	9.32451	0.351383	-13.7017	0.343509	-23.7	0.2	-4.57273	0.181818	249.865	128.047
NN3	NN3.8	115	8.34954	0.407467	-13.1532	0.398901	-25	0.2	-5.75455	0.181818	408.55	209.918
NN3	NN3.8	115	8.34954	0.407467	-13.1532	0.398901	-24.3	0.2	-5.11818	0.181818	341.193	175.417
NN3	NN3.8	115	8.34954	0.407467	-13.1532	0.398901	-23.7	0.2	-4.57273	0.181818	291.41	150.015
