# Supplementary material for: A terrestrial record of atmospheric CO2 across the Middle Eocene Climatic Optimum
Source: Research Square preprint supplement (doi:10.21203/rs.3.rs-8583111/v1), 2026-01-29
Supplement: Supplementary file 2 [file 2da156316716db8a0136fdf3.xlsx]

## Sheet: Sheet1
		CO2 (ppmv)
Sample Height (m)	Sample No. (n)	mean	median	std	min	max
52	24	402.54	444.618	208.112	106.283	783.115
65	12	1105.16	718.209	688.845	550.808	2504.48
115	24	382.787	346.967	126.475	224.986	711.2
