# Supplementary material for: A terrestrial record of atmospheric CO2 across the Middle Eocene Climatic Optimum
Source: Research Square preprint supplement (doi:10.21203/rs.3.rs-8583111/v1), 2026-01-29
Supplement: Supplementary file 3 [file 74f375490a056f0420b21a05.xlsx]

## Sheet: Sheet1
Sample	Replicate	Height_m	MAP	S_z_CS2012	S_z_CS2012_err	Ef	Ef_err	d13C_s	d13C_s_err	d13C_r	d13C_r_err	d13C_a	d13C_a_err	CO2	CO2_err
NN1	NN1.1	52	335.502	1632.4	681	8.12453	0.421576	-11.9927	0.413283	-24.33	0.2	-5.14545	0.181818	1917.81	834.142
NN1	NN1.1	52	296.174	1409.41	681	8.12453	0.421576	-11.9927	0.413283	-25.39	0.2	-6.10909	0.181818	2182.07	1090.24
NN1	NN1.1	52	352.2	1727.07	681	8.12453	0.421576	-11.9927	0.413283	-20.41	0.2	-1.58182	0.181818	681.343	288.728
NN1	NN1.2	52	335.502	1632.4	681	8.16292	0.419144	-12.0345	0.410866	-24.33	0.2	-5.14545	0.181818	1896.24	824.389
NN1	NN1.2	52	296.174	1409.41	681	8.16292	0.419144	-12.0345	0.410866	-25.39	0.2	-6.10909	0.181818	2156.7	1077.06
NN1	NN1.2	52	352.2	1727.07	681	8.16292	0.419144	-12.0345	0.410866	-20.41	0.2	-1.58182	0.181818	671.699	284.699
NN1	NN1.3	52	335.502	1632.4	681	8.51362	0.397421	-12.3614	0.389321	-24.33	0.2	-5.14545	0.181818	1736.37	752.137
NN1	NN1.3	52	296.174	1409.41	681	8.51362	0.397421	-12.3614	0.389321	-25.39	0.2	-6.10909	0.181818	1970.23	980.346
NN1	NN1.3	52	352.2	1727.07	681	8.51362	0.397421	-12.3614	0.389321	-20.41	0.2	-1.58182	0.181818	598.947	254.208
NN1	NN1.4	52	335.502	1632.4	681	7.01002	0.496017	-11.178	0.487159	-24.33	0.2	-5.14545	0.181818	2397.27	1059.3
NN1	NN1.4	52	296.174	1409.41	681	7.01002	0.496017	-11.178	0.487159	-25.39	0.2	-6.10909	0.181818	2759.32	1400.73
NN1	NN1.4	52	352.2	1727.07	681	7.01002	0.496017	-11.178	0.487159	-20.41	0.2	-1.58182	0.181818	885.814	377.355
NN1	NN1.5	52	335.502	1632.4	681	8.91489	0.373821	-13.0521	0.365817	-24.33	0.2	-5.14545	0.181818	1442.12	622.697
NN1	NN1.5	52	296.174	1409.41	681	8.91489	0.373821	-13.0521	0.365817	-25.39	0.2	-6.10909	0.181818	1634.06	809.989
NN1	NN1.5	52	352.2	1727.07	681	8.91489	0.373821	-13.0521	0.365817	-20.41	0.2	-1.58182	0.181818	458.897	197.509
NN1	NN1.6	52	335.502	1632.4	681	8.70721	0.385854	-12.8536	0.377736	-24.33	0.2	-5.14545	0.181818	1521.27	657.876
NN1	NN1.6	52	296.174	1409.41	681	8.70721	0.385854	-12.8536	0.377736	-25.39	0.2	-6.10909	0.181818	1723.6	855.681
NN1	NN1.6	52	352.2	1727.07	681	8.70721	0.385854	-12.8536	0.377736	-20.41	0.2	-1.58182	0.181818	497.38	213.368
NN1	NN1.7	52	335.502	1632.4	681	7.16447	0.485322	-11.3392	0.476509	-24.33	0.2	-5.14545	0.181818	2292.4	1010.06
NN1	NN1.7	52	296.174	1409.41	681	7.16447	0.485322	-11.3392	0.476509	-25.39	0.2	-6.10909	0.181818	2630.83	1331.38
NN1	NN1.7	52	352.2	1727.07	681	7.16447	0.485322	-11.3392	0.476509	-20.41	0.2	-1.58182	0.181818	842.647	358.852
NN1	NN1.8	52	335.502	1632.4	681	8.33105	0.408612	-12.5056	0.400291	-24.33	0.2	-5.14545	0.181818	1670.39	724.728
NN1	NN1.8	52	296.174	1409.41	681	8.33105	0.408612	-12.5056	0.400291	-25.39	0.2	-6.10909	0.181818	1894.07	943.353
NN1	NN1.8	52	352.2	1727.07	681	8.33105	0.408612	-12.5056	0.400291	-20.41	0.2	-1.58182	0.181818	568.252	242.856
NN2	NN2.2	65	287.12	1358.07	681	7.09263	0.490283	-8.17146	0.482954	-21.63	0.2	-2.69091	0.181818	2268.27	1188.05
NN2	NN2.2	65	284.93	1345.65	681	7.09263	0.490283	-8.17146	0.482954	-21.52	0.2	-2.59091	0.181818	2180.62	1151.19
NN2	NN2.2	65	291.82	1384.72	681	7.09263	0.490283	-8.17146	0.482954	-24.84	0.2	-5.60909	0.181818	6689.05	3671.18
NN2	NN2.3	65	287.12	1358.07	681	6.5935	0.525346	-7.66663	0.517999	-21.63	0.2	-2.69091	0.181818	2636.19	1393.99
NN2	NN2.3	65	284.93	1345.65	681	6.5935	0.525346	-7.66663	0.517999	-21.52	0.2	-2.59091	0.181818	2531.34	1348.46
NN2	NN2.3	65	291.82	1384.72	681	6.5935	0.525346	-7.66663	0.517999	-24.84	0.2	-5.60909	0.181818	8669.99	5039.91
NN2	NN2.4	65	287.12	1358.07	681	7.67966	0.45047	-8.74306	0.44324	-21.63	0.2	-2.69091	0.181818	1925.78	1000.48
NN2	NN2.4	65	284.93	1345.65	681	7.67966	0.45047	-8.74306	0.44324	-21.52	0.2	-2.59091	0.181818	1852.99	970.683
NN2	NN2.4	65	291.82	1384.72	681	7.67966	0.45047	-8.74306	0.44324	-24.84	0.2	-5.60909	0.181818	5216.49	2757.97
NN2	NN2.1	65	287.12	1358.07	681	6.99667	0.496946	-8.09116	0.489601	-21.63	0.2	-2.69091	0.181818	2322.2	1218.14
NN2	NN2.1	65	284.93	1345.65	681	6.99667	0.496946	-8.09116	0.489601	-21.52	0.2	-2.59091	0.181818	2232.1	1180.06
NN2	NN2.1	65	291.82	1384.72	681	6.99667	0.496946	-8.09116	0.489601	-24.84	0.2	-5.60909	0.181818	6950.27	3843.5
NN3	NN3.1	115	315.73	1520.29	681	7.78984	0.4432	-12.0427	0.434592	-25	0.2	-5.75455	0.181818	2095.52	977.481
NN3	NN3.1	115	327.44	1586.68	681	7.78984	0.4432	-12.0427	0.434592	-24.3	0.2	-5.11818	0.181818	1824.95	817.418
NN3	NN3.1	115	332.43	1614.98	681	7.78984	0.4432	-12.0427	0.434592	-23.7	0.2	-4.57273	0.181818	1591.57	701.403
NN3	NN3.2	115	315.73	1520.29	681	6.84661	0.507442	-11.1381	0.498477	-25	0.2	-5.75455	0.181818	2703.08	1280.98
NN3	NN3.2	115	327.44	1586.68	681	6.84661	0.507442	-11.1381	0.498477	-24.3	0.2	-5.11818	0.181818	2337.59	1061.81
NN3	NN3.2	115	332.43	1614.98	681	6.84661	0.507442	-11.1381	0.498477	-23.7	0.2	-4.57273	0.181818	2033.36	907.239
NN3	NN3.3	115	315.73	1520.29	681	7.25767	0.478919	-12.0333	0.469852	-25	0.2	-5.75455	0.181818	2100.92	985.427
NN3	NN3.3	115	327.44	1586.68	681	7.25767	0.478919	-12.0333	0.469852	-24.3	0.2	-5.11818	0.181818	1829.57	824.235
NN3	NN3.3	115	332.43	1614.98	681	7.25767	0.478919	-12.0333	0.469852	-23.7	0.2	-4.57273	0.181818	1595.59	707.363
NN3	NN3.4	115	315.73	1520.29	681	9.83865	0.326102	-14.0651	0.318537	-25	0.2	-5.75455	0.181818	1215.57	558.115
NN3	NN3.4	115	327.44	1586.68	681	9.83865	0.326102	-14.0651	0.318537	-24.3	0.2	-5.11818	0.181818	1053.74	465.435
NN3	NN3.4	115	332.43	1614.98	681	9.83865	0.326102	-14.0651	0.318537	-23.7	0.2	-4.57273	0.181818	908.367	395.662
NN3	NN3.5	115	315.73	1520.29	681	9.75474	0.329981	-13.9836	0.322376	-25	0.2	-5.75455	0.181818	1242.68	570.737
NN3	NN3.5	115	327.44	1586.68	681	9.75474	0.329981	-13.9836	0.322376	-24.3	0.2	-5.11818	0.181818	1078.02	476.273
NN3	NN3.5	115	332.43	1614.98	681	9.75474	0.329981	-13.9836	0.322376	-23.7	0.2	-4.57273	0.181818	930.231	405.238
NN3	NN3.6	115	315.73	1520.29	681	8.65105	0.389176	-13.3358	0.380822	-25	0.2	-5.75455	0.181818	1478.75	683.517
NN3	NN3.6	115	327.44	1586.68	681	8.65105	0.389176	-13.3358	0.380822	-24.3	0.2	-5.11818	0.181818	1288.06	572.625
NN3	NN3.6	115	332.43	1614.98	681	8.65105	0.389176	-13.3358	0.380822	-23.7	0.2	-4.57273	0.181818	1118.37	490.034
NN3	NN3.7	115	315.73	1520.29	681	9.32451	0.351383	-13.7017	0.343509	-25	0.2	-5.75455	0.181818	1340.68	617.025
NN3	NN3.7	115	327.44	1586.68	681	9.32451	0.351383	-13.7017	0.343509	-24.3	0.2	-5.11818	0.181818	1165.53	515.939
NN3	NN3.7	115	332.43	1614.98	681	9.32451	0.351383	-13.7017	0.343509	-23.7	0.2	-4.57273	0.181818	1008.82	440.231
NN3	NN3.8	115	315.73	1520.29	681	8.34954	0.407467	-13.1532	0.398901	-25	0.2	-5.75455	0.181818	1552.79	719.417
NN3	NN3.8	115	327.44	1586.68	681	8.34954	0.407467	-13.1532	0.398901	-24.3	0.2	-5.11818	0.181818	1353.41	603.049
NN3	NN3.8	115	332.43	1614.98	681	8.34954	0.407467	-13.1532	0.398901	-23.7	0.2	-4.57273	0.181818	1176.55	516.641
