# Supplementary material for: A terrestrial record of atmospheric CO2 across the Middle Eocene Climatic Optimum
Source: Research Square preprint supplement (doi:10.21203/rs.3.rs-8583111/v1), 2026-01-29
Supplement: Supplementary file 4 [file 9f12bf30cd001aa30a16c84b.xlsx]

## Sheet: Sheet1
Sample	Replicate	Height_m	pCO2_mean	pCO2_std	pCO2_low95	pCO2_high95
NN1	NN1.1	52	484.786	220.544	93.3827	942.841
NN1	NN1.1	52	637.509	288.846	123.048	1238.25
NN1	NN1.1	52	162.295	74.3638	32.7524	320.624
NN1	NN1.2	52	480.568	217.471	95.4802	943.846
NN1	NN1.2	52	633.094	288.465	124.249	1238.94
NN1	NN1.2	52	161.493	73.3368	33.1484	319.832
NN1	NN1.3	52	436.634	199.067	91.9148	852.418
NN1	NN1.3	52	577.498	258.973	111.208	1107.02
NN1	NN1.3	52	142.14	65.175	27.2929	278.748
NN1	NN1.4	52	611.256	278.729	118.792	1200.34
NN1	NN1.4	52	814.913	373.251	165.314	1603.81
NN1	NN1.4	52	210.906	97.4656	42.1581	414.674
NN1	NN1.5	52	361.841	162.538	74.1271	701.909
NN1	NN1.5	52	475.825	213.552	94.7242	922.726
NN1	NN1.5	52	109.253	51.0618	20.62	215.915
NN1	NN1.6	52	384.43	170.715	80.5834	738.502
NN1	NN1.6	52	502.165	224.081	106.5	965.107
NN1	NN1.6	52	118.588	54.6401	23.7762	232.85
NN1	NN1.7	52	587.504	269.558	110.271	1168.01
NN1	NN1.7	52	776.454	362.173	146.696	1556.47
NN1	NN1.7	52	200.746	93.095	38.9302	398.551
NN1	NN1.8	52	417.563	190.09	80.7084	812.298
NN1	NN1.8	52	554.373	247.573	108.667	1071.48
NN1	NN1.8	52	135.053	62.491	27.086	268.746
NN2	NN2.2	65	693.351	320.932	137.001	1374.83
NN2	NN2.2	65	682.084	313.146	140.639	1346.42
NN2	NN2.2	65	2086.91	1063.41	413.078	4512.37
NN2	NN2.3	65	809.276	374.621	165.367	1623.39
NN2	NN2.3	65	782.67	363.887	147.506	1563.53
NN2	NN2.3	65	2761.99	1519.56	488.749	6467.74
NN2	NN2.4	65	590.957	266.466	119.066	1154.67
NN2	NN2.4	65	566.859	256.151	112.608	1104.53
NN2	NN2.4	65	1594.9	760.183	299.409	3286.88
NN2	NN2.1	65	709.203	330.673	133.311	1411.3
NN2	NN2.1	65	689.397	317.243	136.028	1350.61
NN2	NN2.1	65	2145.78	1112.14	367.925	4798.55
NN3	NN3.1	115	566.424	257.227	112.623	1102.61
NN3	NN3.1	115	475.178	214.091	98.756	923.348
NN3	NN3.1	115	406.405	185.955	75.6161	791.28
NN3	NN3.2	115	734.96	336.896	144.48	1458.12
NN3	NN3.2	115	613.59	280.987	115.293	1199.54
NN3	NN3.2	115	524.947	241.559	101.551	1034.48
NN3	NN3.3	115	566.55	257.65	115.988	1097.07
NN3	NN3.3	115	474.664	214.827	95.4881	932.568
NN3	NN3.3	115	405.394	186.954	77.41	806.605
NN3	NN3.4	115	328.594	145.821	66.4461	628.423
NN3	NN3.4	115	274.529	123.026	53.1159	526.678
NN3	NN3.4	115	232.43	104.757	46.9807	448.312
NN3	NN3.5	115	335.372	152.08	64.706	649.258
NN3	NN3.5	115	280.811	126.166	53.971	538.944
NN3	NN3.5	115	236.943	107.583	48.7357	455.8
NN3	NN3.6	115	399.189	180.374	77.8883	777.54
NN3	NN3.6	115	335.641	151.498	69.6854	653.58
NN3	NN3.6	115	284.429	128.8	54.7374	555.182
NN3	NN3.7	115	359.632	160.499	74.1234	684.445
NN3	NN3.7	115	303.839	137.139	60.0403	590.016
NN3	NN3.7	115	255.469	114.605	50.967	491.369
NN3	NN3.8	115	420.003	189.358	84.5533	810.571
NN3	NN3.8	115	349.703	157.369	71.2691	681.177
NN3	NN3.8	115	301.713	136.371	60.1386	582.934
